# Supplementary material for: Metabolic Profile of C-Prenyl Coumarins Using Mass Spectrometry-Based Metabolomics
Source: MDPI journal article supplement (doi:10.3390/molecules26216558), 2021-10-29
Supplement: s1 [file s1]

## **Supplementary Materials**

### **Metabolic Profile of C-Prenyl Coumarins Using Mass Spectrometry-Based Metabolomics**

Yan Cheng<sup>1,#</sup>, Xiao-Fang Ma<sup>2,#</sup>, Qi Zhao<sup>1</sup>, Chun-Yan Wang<sup>1</sup>

Dong-Mei Yan<sup>2</sup>, Fei Li<sup>1</sup>

- 1 Laboratory of Metabolomics and Drug-induced Liver Injury, Frontiers Science Center for Disease-related Molecular Network, West China Hospital, Sichuan University, Chengdu 610041, China; Yancheng2020@wchscu.cn
- 2 Academician Workstation, Jiangxi University of Chinese Medicine, Nanchang 330004, China; yanli1999@163.com

<sup>#</sup> These authors equally contributed to this work.

**Figure S1. Metabolic profiling of MH, ISM and MER *in vitro*.** (A) Scores plot of OPLS-DA and S-plot analysis from control and MH incubated with MLM. (B) Scores plot of OPLS-DA and S-plot analysis from control and ISM incubated with MLM. (C) Scores plot of OPLS-DA and S-plot analysis from control and MER incubated with MLM.

**Figure S2. Role of MH, ISM and MER in RAW 264.7.** (A) Cell viability test of MH, ISM and MER in RAW 264.7. (B) Correlation of NO production and inflammatory cytokines transcription level.

**Figure S3. Metabolic map of MH and ISM.** (A) Metabolic map of MH. (B) Metabolic map of ISM.

**Fig S1**

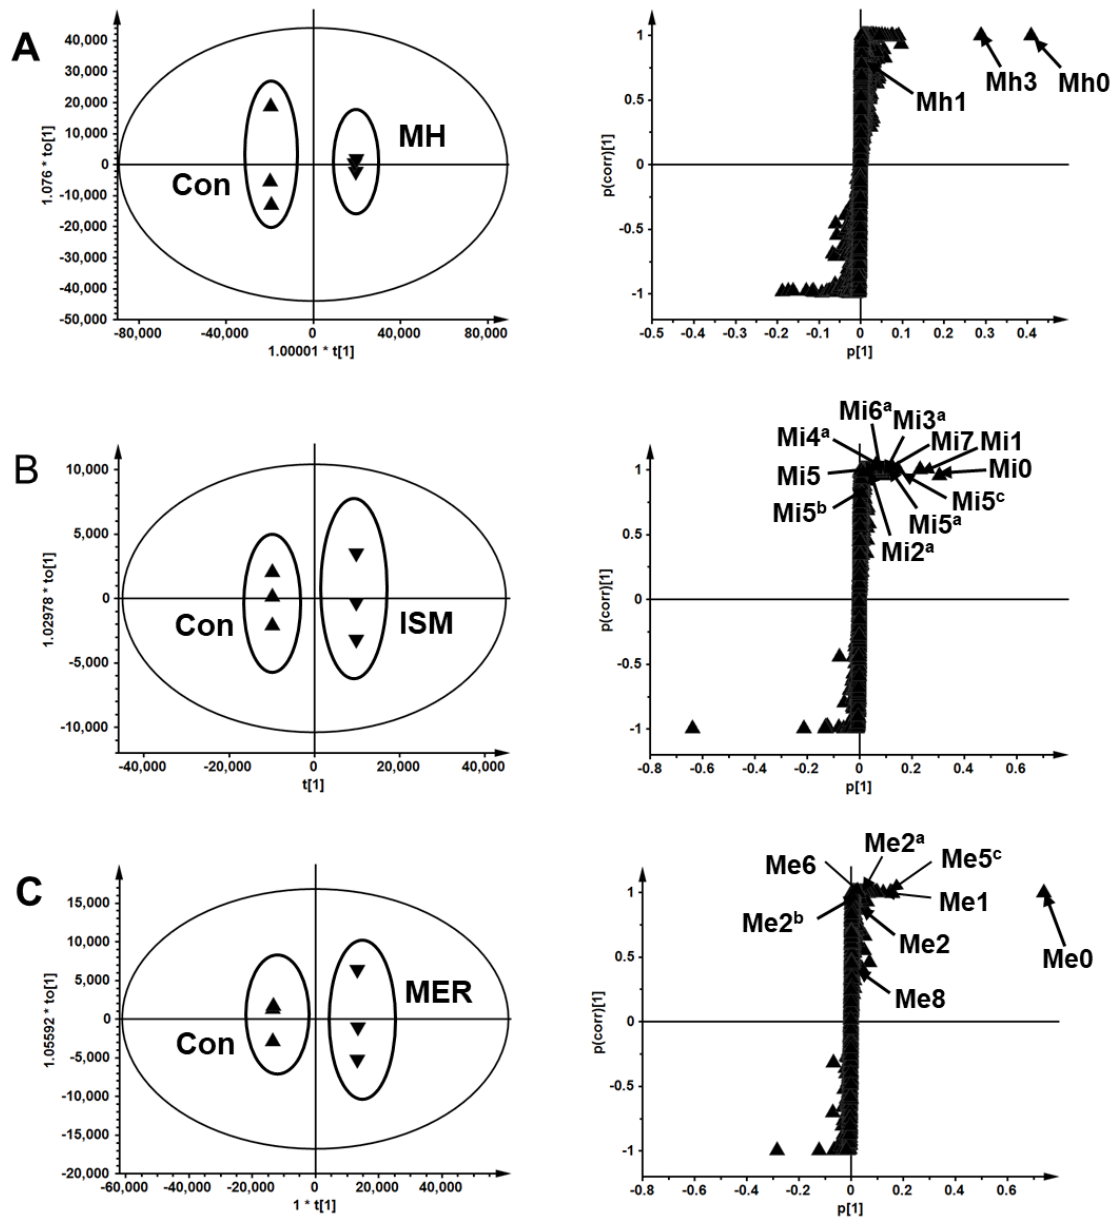

**Fig S2**

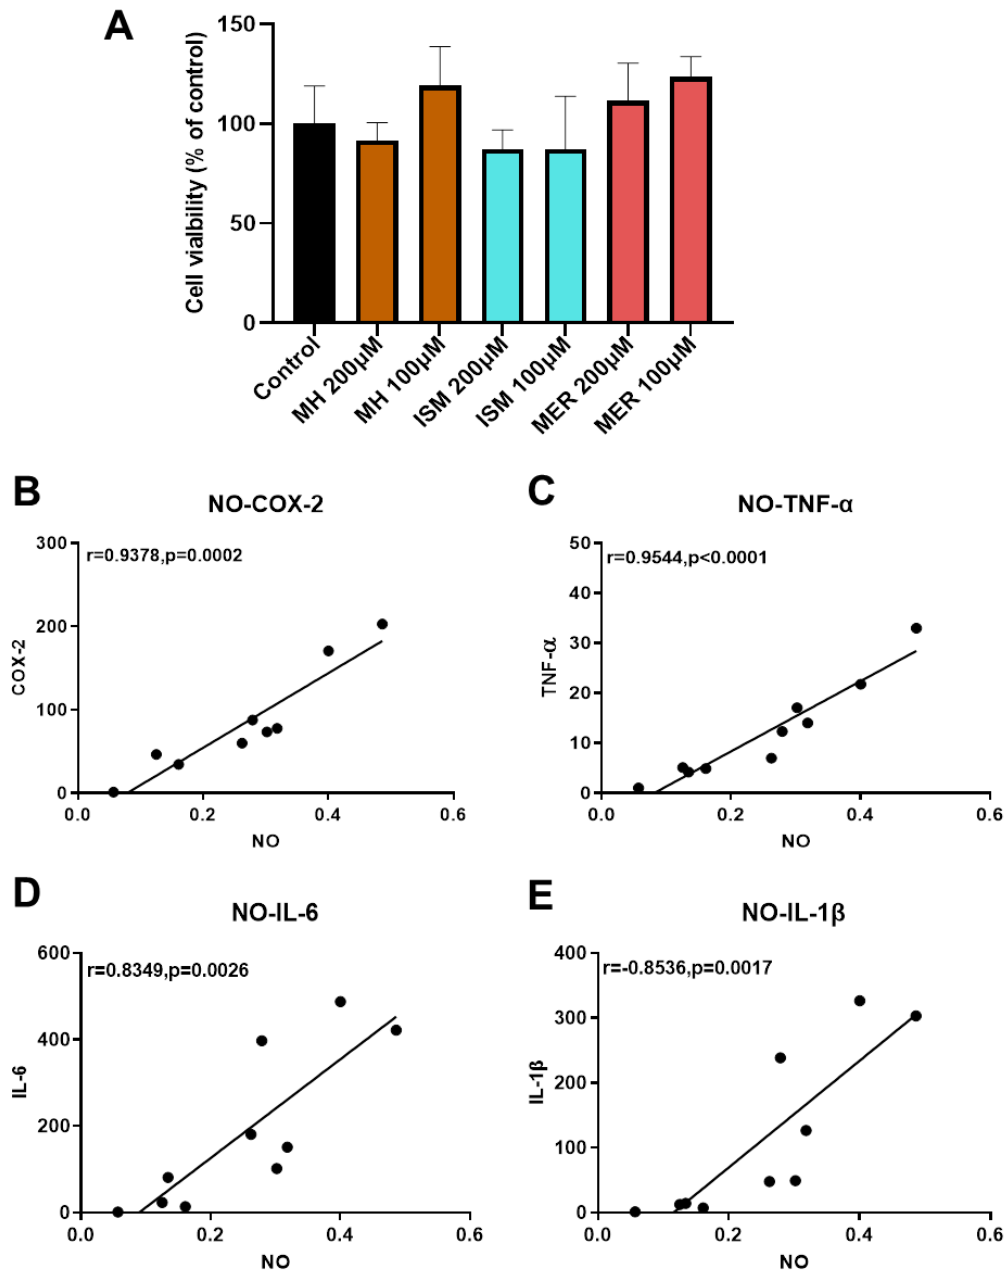

**Fig S3**

**A**

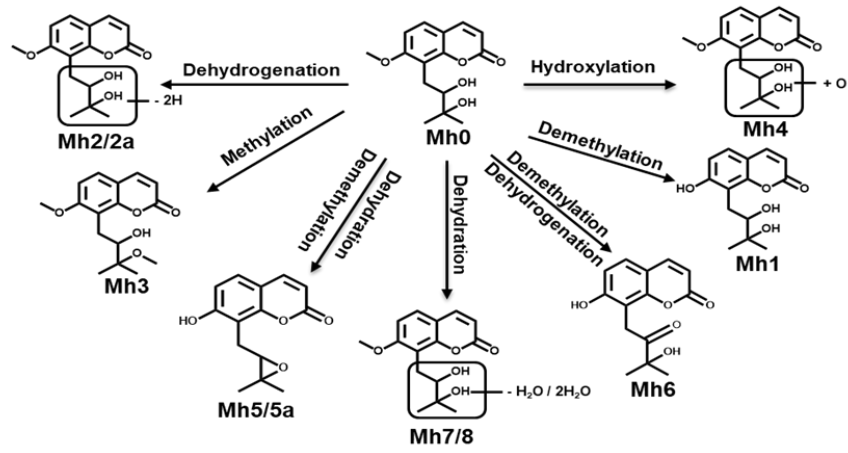

**B**

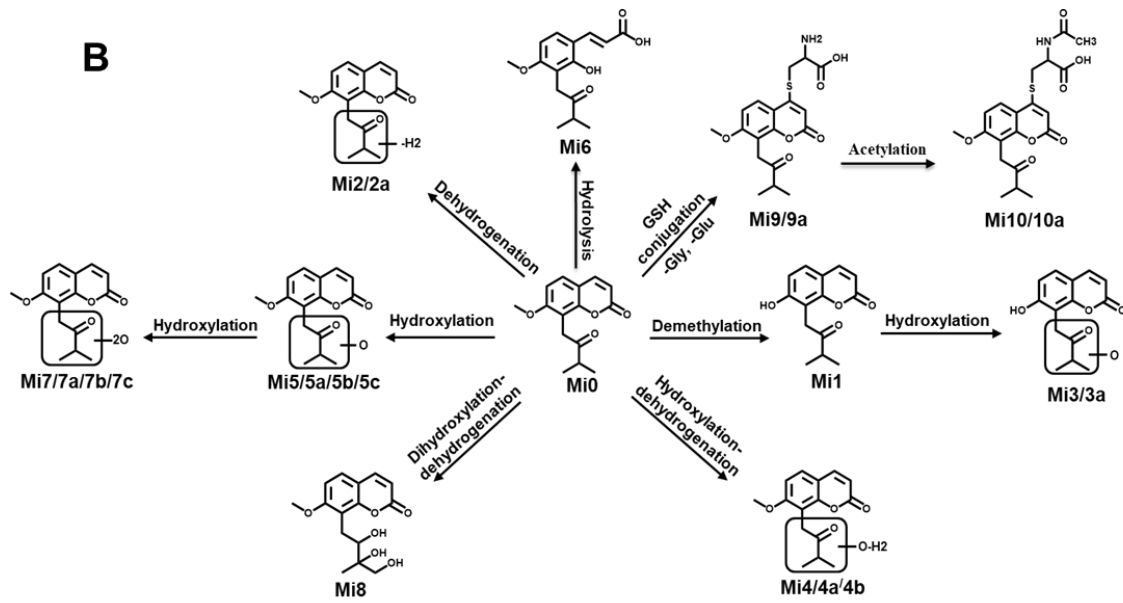

Table S1. Summary of MH metabolites produced *in vivo* and *in vitro* metabolism

| Metabolite ID | Molecular formula                              | RT (min) | m/z[M+H] <sup>+</sup> | Mass error (ppm) | MS/MS fragments         | Identification                       | Source  |
|---------------|------------------------------------------------|----------|-----------------------|------------------|-------------------------|--------------------------------------|---------|
| Mh0           | C <sub>15</sub> H <sub>18</sub> O <sub>5</sub> | 6.32     | 279.1227              | 2.53             | 261, 243, 189, 175, 159 | Meranzin hydrate                     | C, H, M |
| Mh1*          | C <sub>14</sub> H <sub>16</sub> O <sub>5</sub> | 5.57     | 265.1070              | 1.64             | 247, 229, 223, 177      | Mh-CH <sub>2</sub>                   | C, M    |
| Mh2*          | C <sub>15</sub> H <sub>16</sub> O <sub>5</sub> | 5.40     | 277.1070              | 3.81             | 259, 249, 235, 227, 219 | Mh-2H                                | C, M, U |
| Mh2a*         | C <sub>15</sub> H <sub>16</sub> O <sub>5</sub> | 6.07     | 277.1070              | -1.24            | 259, 231, 205, 189, 175 | Mh-2H                                | H, M    |
| Mh3*          | C <sub>16</sub> H <sub>20</sub> O <sub>5</sub> | 6.12     | 293.1383              | -4.92            | 275, 261, 247, 229, 217 | Mh+CH <sub>2</sub>                   | H, M, U |
| Mh4*          | C <sub>15</sub> H <sub>18</sub> O <sub>6</sub> | 6.05     | 295.1176              | -1.08            | 277, 259, 247, 219, 205 | Mh+O                                 | M       |
| Mh5*          | C <sub>14</sub> H <sub>14</sub> O <sub>4</sub> | 3.98     | 247.0960              | 3.64             | 265, 229, 201, 187, 175 | Mh-CH <sub>2</sub> -H <sub>2</sub> O | U       |
| Mh5a*         | C <sub>14</sub> H <sub>14</sub> O <sub>4</sub> | 5.05     | 247.0960              | 3.64             | 263, 229, 201, 187, 175 | Mh-CH <sub>2</sub> -H <sub>2</sub> O | U       |
| Mh6*          | C <sub>14</sub> H <sub>14</sub> O <sub>5</sub> | 4.51     | 263.0910              | -2.66            | 245, 277, 191, 163, 116 | Mh-CH <sub>2</sub> -2H               | U       |
| Mh7*          | C <sub>15</sub> H <sub>14</sub> O <sub>3</sub> | 5.84     | 243.1010              | 4.93             | 228, 203, 189, 175, 159 | Mh-2H <sub>2</sub> O                 | U       |
| Mh8*          | C <sub>15</sub> H <sub>16</sub> O <sub>4</sub> | 5.81     | 261.1110              | -4.59            | 243, 189, 177, 159, 131 | Mh-H <sub>2</sub> O                  | P       |

a/b/c/d, isomer metabolite; \*, undescribed metabolite. P, plasma; U, urine; C, cell; H, HLM; M, MLM;

Table S2. Summary of ISM metabolites produced *in vivo* and *in vitro* metabolism

| Metabolite ID | Molecular formula                                 | RT (min) | m/z[M+H] <sup>+</sup> | Mass error (ppm) | MS/MS fragments         | Identification         | Source        |
|---------------|---------------------------------------------------|----------|-----------------------|------------------|-------------------------|------------------------|---------------|
| Mi0           | C <sub>15</sub> H <sub>16</sub> O <sub>4</sub>    | 8.41     | 261.1121              | 1.80             | 243, 231, 201, 189      | Isomeranzin            | P, F, U, H, M |
| Mi1*          | C <sub>14</sub> H <sub>14</sub> O <sub>4</sub>    | 6.94     | 247.0965              | 3.32             | 229, 201, 187, 175      | Ism-CH <sub>2</sub>    | P, F, U, H, M |
| Mi2*          | C <sub>15</sub> H <sub>14</sub> O <sub>4</sub>    | 7.11     | 259.0965              | -6.10            | 243, 231, 213, 189      | Ism-2H                 | H, M          |
| Mi2a*         | C <sub>15</sub> H <sub>14</sub> O <sub>4</sub>    | 8.19     | 259.0965              | -1.85            | 241, 231, 205, 189      | Ism-2H                 | F, U, H, M    |
| Mi3*          | C <sub>14</sub> H <sub>14</sub> O <sub>5</sub>    | 5.54     | 263.0914              | 1.54             | 245, 233, 221, 187      | Ism+O-CH <sub>2</sub>  | F, M          |
| Mi3a*         | C <sub>14</sub> H <sub>14</sub> O <sub>5</sub>    | 6.39     | 263.0914              | 3.06             | 245, 217, 203, 191, 175 | Ism+O -CH <sub>2</sub> | H, M          |
| Mi4*          | C <sub>15</sub> H <sub>14</sub> O <sub>5</sub>    | 6.08     | 275.0914              | -8.70            | 231, 215, 203, 189      | Ism+O -2H              | H             |
| Mi4a*         | C <sub>15</sub> H <sub>14</sub> O <sub>5</sub>    | 6.79     | 275.0914              | 1.47             | 259, 247, 231, 217, 205 | Ism+O -2H              | H             |
| Mi4b*         | C <sub>15</sub> H <sub>14</sub> O <sub>5</sub>    | 7.58     | 275.0914              | 2.56             | 259, 247, 243, 217      | Ism+O-2H               | M             |
| Mi5*          | C <sub>15</sub> H <sub>16</sub> O <sub>5</sub>    | 6.33     | 277.107               | 0.56             | 263, 247, 231, 221      | Ism+O                  | U, H, M       |
| Mi5a*         | C <sub>15</sub> H <sub>16</sub> O <sub>5</sub>    | 6.67     | 277.107               | 3.45             | 259, 231, 217, 205, 189 | Ism+O                  | H, M          |
| Mi5b*         | C <sub>15</sub> H <sub>16</sub> O <sub>5</sub>    | 7.12     | 277.107               | -0.88            | 259, 249, 243, 233, 227 | Ism+O                  | F, H, M       |
| Mi5c*         | C <sub>15</sub> H <sub>16</sub> O <sub>5</sub>    | 7.95     | 277.107               | 3.56             | 259, 243, 221, 205,     | Ism+O                  | F, U, H, M    |
| Mi6*          | C <sub>15</sub> H <sub>18</sub> O <sub>5</sub>    | 6.99     | 279.1227              | 5.03             | 261, 233, 249, 219      | Ism+H <sub>2</sub> O   | U             |
| Mi7*          | C <sub>15</sub> H <sub>16</sub> O <sub>6</sub>    | 5.71     | 293.102               | 2.18             | 275, 263, 245, 231, 217 | Ism+2O                 | H, M          |
| Mi7a*         | C <sub>15</sub> H <sub>16</sub> O <sub>6</sub>    | 6.08     | 293.102               | 10.37            | 279, 263, 219, 203, 189 | Ism+2O                 | H             |
| Mi7b*         | C <sub>15</sub> H <sub>16</sub> O <sub>6</sub>    | 6.36     | 293.102               | 15.83            | 275, 261, 247, 233, 207 | Ism+2O                 | M             |
| Mi7c*         | C <sub>15</sub> H <sub>16</sub> O <sub>6</sub>    | 6.63     | 293.102               | 4.23             | 277, 259, 231, 217, 205 | Ism+2O                 | M             |
| Mi8*          | C <sub>15</sub> H <sub>18</sub> O <sub>6</sub>    | 6.24     | 295.1176              | 0.99             | 277, 259, 233, 221, 203 | Ism+2O+2H              | H, M          |
| Mi9*          | C <sub>18</sub> H <sub>21</sub> NO <sub>6</sub> S | 5.36     | 380.1162              | -0.08            | 334, 291, 259           | Ism+Cysteine           | P, F, U       |
| Mi9a*         | C <sub>18</sub> H <sub>21</sub> NO <sub>6</sub> S | 6.04     | 380.1162              | 2.56             | 362, 334, 291, 259      | Ism+Cysteine           | P, F, U       |
| Mi10*         | C <sub>20</sub> H <sub>23</sub> NO <sub>7</sub> S | 6.56     | 422.1268              | 0.72             | 376, 334, 291, 259      | Ism+N-acetylCysteine   | F, U          |
| Mi10a*        | C <sub>20</sub> H <sub>23</sub> NO <sub>7</sub> S | 7.36     | 422.1268              | 2.15             | 404, 380, 376, 362, 334 | Ism+N-acetylCysteine   | F, U          |

a/b/c/d, isomer metabolite; \*, undescribed metabolite. P, plasma; F, feces; U, urine; H, HLM; M, MLM
